# Supplementary material
Source: PubMed Central journal article supplement (PMC3548975)
Supplement: NIHMS409791-supplement-01.pdf [file NIHMS409791-supplement-01.pdf]

## **SUPPLEMENTARY DATA**

### **Patients and Controls**

The 1168 SALS patients included in this study were recruited from different ALS Centres participating to the Italian SLAGEN Consortium. The SALS cohort was composed of 1119 cases and 49 individuals with concomitant ALS and FTD, while the FTD cohort comprised 203 patients (30 familial and 173 sporadic cases). All included patients fulfilled the El Escorial revised criteria for ALS and the Neary criteria for FTD diagnosis (Miller et al. 1999; Neary et al. 1998). The ALS cohort was characterized by a male to female sex ratio of 2:1 and a mean age of onset of  $58.4 \pm 12.1$ ; the FTD cohort presented a male to female sex ratio of 1:1 and a mean age of onset of  $63.5 \pm 9.5$ . SALS individuals included in the study were previously screened for *C9ORF72*, *SOD1*, *TARDBP* and *FUS* gene mutations as already reported (Ratti et al. 2012, Corrado et al. 2006; Corrado et al. 2009; Corrado et al. 2010; Del Bo et al. 2009); 78 SALS and 4 SALS-FTD patients carried a mutation in one of these genes. Mutations in *C9ORF72* or *GRN* genes were excluded in the FTD cohort considered in this analysis (Borroni et al. 2008).

The control group consisted of 1512 Italian healthy individuals (University and Hospital staff, blood donors) who did not have a personal or family history for neurodegenerative diseases.

### **Standard protocol approval and patient consent**

We received approval for this study from the local ethical committees on human experimentation of each participating Institution. Written informed consent was designed according to the Declaration of Helsinki and obtained from all patients and healthy subjects participating to the study.

### **Mutational analysis**

Genomic DNA was obtained from peripheral blood by standard methods. All the 3 coding exons of *PFNI* gene and at least 30bp of adjacent intronic sequences were amplified by PCR (Wu et al. 2012) and directly analyzed on ABI 3500 instrument (Applied Biosystems, Foster City, CA) using

the Big-Dye Terminator v3.1 kit (Applied Biosystems). Nucleotide numbering of *PFN1* gene mutations reflects cDNA numbering with +1 corresponding to the A of the ATG translation initiation codon of the GenBank reference sequence NM\_005022.3. The initiation codon is Met 1.

**Supplementary Table 1. SNP rs13204 genotype and allele frequencies in SALS, FTD and Control groups.**

|          | ALS cases          |                        | FTD cases          |                        | Controls           |                        |
|----------|--------------------|------------------------|--------------------|------------------------|--------------------|------------------------|
| Genotype | Genotype Frequency | Minor Allele Frequency | Genotype Frequency | Minor Allele Frequency | Genotype Frequency | Minor Allele Frequency |
| CC       | 0.925              | 0.038                  | 0.936              | 0.039                  | 0.915              | 0.043                  |
| CT       | 0.074              |                        | 0.049              |                        | 0.082              |                        |
| TT       | 0.001              |                        | 0.015              |                        | 0.003              |                        |

**Supplementary References**

- Andersen, P.M., Al-Chalabi, A., 2011. Clinical genetics of amyotrophic lateral sclerosis: what do we really know? *Nat. Rev. Neurol.* 7, 603-615. doi:10.1038/nrneurol.2011.150
- Borroni, B., Archetti, S., Alberici, A., Agosti, C., Gennarelli, M., Bigni, B., Bonvicini, C., Ferrari, M., Bellelli, G., Galimberti, D., Scarpini, E., Di Lorenzo, D., Caimi, L., Caltagirone, C., Di Luca, M., Padovani, A., 2008. Progranulin genetic variations in frontotemporal lobar degeneration: evidence for low mutation frequency in an Italian clinical series. *Neurogenetics.* 9 (3), 197-205. doi: 10.1007/s10048-008-0127-3
- Corrado, L., D'Alfonso, S., Bergamaschi, L., Testa, L., Leone, M., Nasuelli, N., Momigliano-Richiardi, P., Mazzini, L., 2006. SOD1 gene mutations in Italian patients with Sporadic Amyotrophic Lateral Sclerosis (ALS). *Neuromuscul. Disord.* 16, 800-804. doi:10.1016/j.nmd.2006.07.004

- Corrado, L., Ratti, A., Gellera, C., Buratti, E., Castellotti, B., Carlomagno, Y., Ticozzi, N., Mazzini, L., Testa, L., Taroni, F., Baralle, F.E., Silani, V., D'Alfonso, S., 2009. High frequency of TARDBP gene mutations in Italian patients with amyotrophic lateral sclerosis. *Hum. Mutat.* 30, 688-694. doi:10.1002/humu.20950
- Corrado, L., Del Bo, R., Castellotti, B., Ratti, A., Cereda, C., Penco, S., Sorarù, G., Carlomagno, Y., Grezzi, S., Pensato, V., Colombrita, C., Gagliardi, S., Cozzi, L., Orsetti, V., Mancuso, M., Siciliano, G., Mazzini, L., Comi, G.P., Gellera, C., Ceroni, M., D'Alfonso, S., Silani, V., 2010. Mutations of FUS gene in sporadic amyotrophic lateral sclerosis. *J. Med. Genet.* 47, 190-194. doi:10.1136/jmg.2009.071027
- Del Bo, R., Ghezzi, S., Corti, S., Pandolfo, M., Ranieri, M., Santoro, D., Ghione, I., Prellè, A., Orsetti, V., Mancuso, M., Sorarù, G., Briani, C., Angelini, C., Siciliano, G., Bresolin, N., Comi, G.P., 2009. TARDBP (TDP-43) sequence analysis in patients with familial and sporadic ALS: identification of two novel mutations. *Eur. J. Neurol.* 16, 727-732. doi:10.1111/j.1468-1331.2009.02574.x
- Miller, R.G., Munsat, T.L., Swash, M., Brooks, B.R., 1999. Consensus guidelines for the design and implementation of clinical trials in ALS. World Federation of Neurology committee on Research. *J. Neurol. Sci.* 169, 2-12. doi: 10.1016/S0022-510X(99)00209-9
- Neary, D., Snowden, J.S., Gustafson, L., Passant, U., Stuss, D., Black, S., Freedman, M., Kertesz, A., Robert, P.H., Albert, M., Boone, K., Miller, B.L., Cummings, J., Benson, D.F., 1998. Frontotemporal lobar degeneration: a consensus on clinical diagnostic criteria. *Neurology* 51, 1546-1554.
- Orr HT., 2011. FTD and ALS: genetic ties that bind. *Neuron* 72, 189-90. doi: 10.1016/j.neuron.2011.10.001

- Ratti, A., Corrado, L., Castellotti, B., Del Bo, R., Fogh, I., Cereda, C., Tiloca, C., D'Ascenzo, C., Bagarotti, A., Pensato, V., Ranieri, M., Gagliardi, S., Calini, D., Mazzini, L., Taroni, F., Corti, S., Ceroni, M., Oggioni, G.D., Lin, K., Powell, J.F., Sorarù, G., Ticozzi, N., Comi, G.P., D'Alfonso, S., Gellera, C., Silani, V., SLAGEN Consortium, 2012. C9ORF72 repeat expansion in a large Italian ALS cohort: evidence of a founder effect. *Neurobiol Aging* 33, 2528.e7–2528.e14. doi: 10.1016/j.neurobiolaging.2012.06.008
- Talbot, K., 2009. Another gene for ALS: mutations in sporadic cases and the rare variant hypothesis. *Neurology* 73, 1172-1173. doi: 10.1212/WNL.0b013e3181bd1161
- Wu, C.H., Fallini, C., Ticozzi, N., Keagle, P.J., Sapp, P.C., Piotrowska, K., Lowe, P., Koppers, M., McKenna-Yasek, D., Baron, D.M., Kost, J.E., Gonzalez-Perez, P., Fox, A.D., Adams, J., Taroni, F., Tiloca, C., Leclerc, A.L., Chafe, S.C., Mangroo, D., Moore, M.J., Zitzewitz, J.A., Xu, Z.S., van den Berg, L.H., Glass, J.D., Siciliano, G., Cirulli, E.T., Goldstein, D.B., Salachas, F., Meininger, V., Rossoll, W., Ratti, A., Gellera, C., Bosco, D.A., Bassell, G.J., Silani, V., Drory, V.E., Brown, R.H., Landers, J.E., 2012. Mutations in the profilin 1 gene cause familial amyotrophic lateral sclerosis. *Nature*. Epub ahead of print. doi: 10.1038/nature11280.
